# Supplementary material for: Reporting a new siderophore based Ca2+selective chemosensor that works as a staining agent in the live organism Artemia
Source: Royal Society of Chemistry journal article supplement (doi:10.1039/c5an01733e), 2015-01-01
Supplement: c5an01733e1.pdf [file c5an01733e1.pdf]

**Electronic supplementary information (ESI)**

**Reporting a new siderophore based Ca<sup>2+</sup> selective  
chemosensor that works as staining agent in live  
organism *Artemia***

**M. Raju,<sup>a</sup> Ratish R. Nair,<sup>a</sup> Ishan H. Raval,<sup>b</sup> Soumya**

**Halder<sup>\*bc</sup> and Pabitra B. Chatterjee<sup>\*ac</sup>**

<sup>a</sup>Analytical Discipline and Centralized Instrument Facility (AD&CIF),  
CSIR-CSMCRI, Bhavnagar, Gujarat, India.

<sup>b</sup>Marine Biotechnology and Ecology Discipline, CSIR-CSMCRI,  
Bhavnagar, Gujarat, India.

<sup>c</sup>Academy of Scientific and Innovative Research (AcSIR), CSIR-CSMCRI,  
Bhavnagar, Gujarat, India.

## Contents

## Page No.

|                                                                                                                                                                     |    |
|---------------------------------------------------------------------------------------------------------------------------------------------------------------------|----|
| <b>Figure S1.</b> $^{13}\text{C}$ NMR of <b>HL</b> in absence and in presence of calcium salts                                                                      | S3 |
| <b>Figure S2.</b> Mass spectra of <b>HL</b> showing 1:1 binding with $\text{Ca}^{2+}$                                                                               | S4 |
| <b>Figure S3.</b> Fluorescence intensities of <b>HL</b> (10 $\mu\text{M}$ ) and $\text{Ca}^{2+}$ (10 $\mu\text{M}$ ) mixture in presence of 1 mM $\text{Mg}^{2+}$ . | S5 |
| <b>Figure S4.</b> Effect of $\text{Ca}^{2+}$ binding to <b>HL</b> in presence of $\text{EDTA}^{2-}$ and L-Cysteine                                                  | S6 |
| <b>Figure S5.</b> Effect of $\text{Cu}^{2+}$ binding to <b>HL</b> in presence of $\text{EDTA}^{2-}$ and L-Cysteine                                                  | S7 |
| <b>Table S1.</b> Toxicity results of <b>HL</b> studied with <i>Artemia</i>                                                                                          | S8 |
| <b>Table S2.</b> Comparison of optical properties of <b>HL</b> with the organic and water-organic mixture soluble $\text{Ca}^{2+}$ -selective chemosensors.         |    |

Figure S1.  $^{13}\text{C}$  NMR of HL in the absence and in the presence of calcium salts.

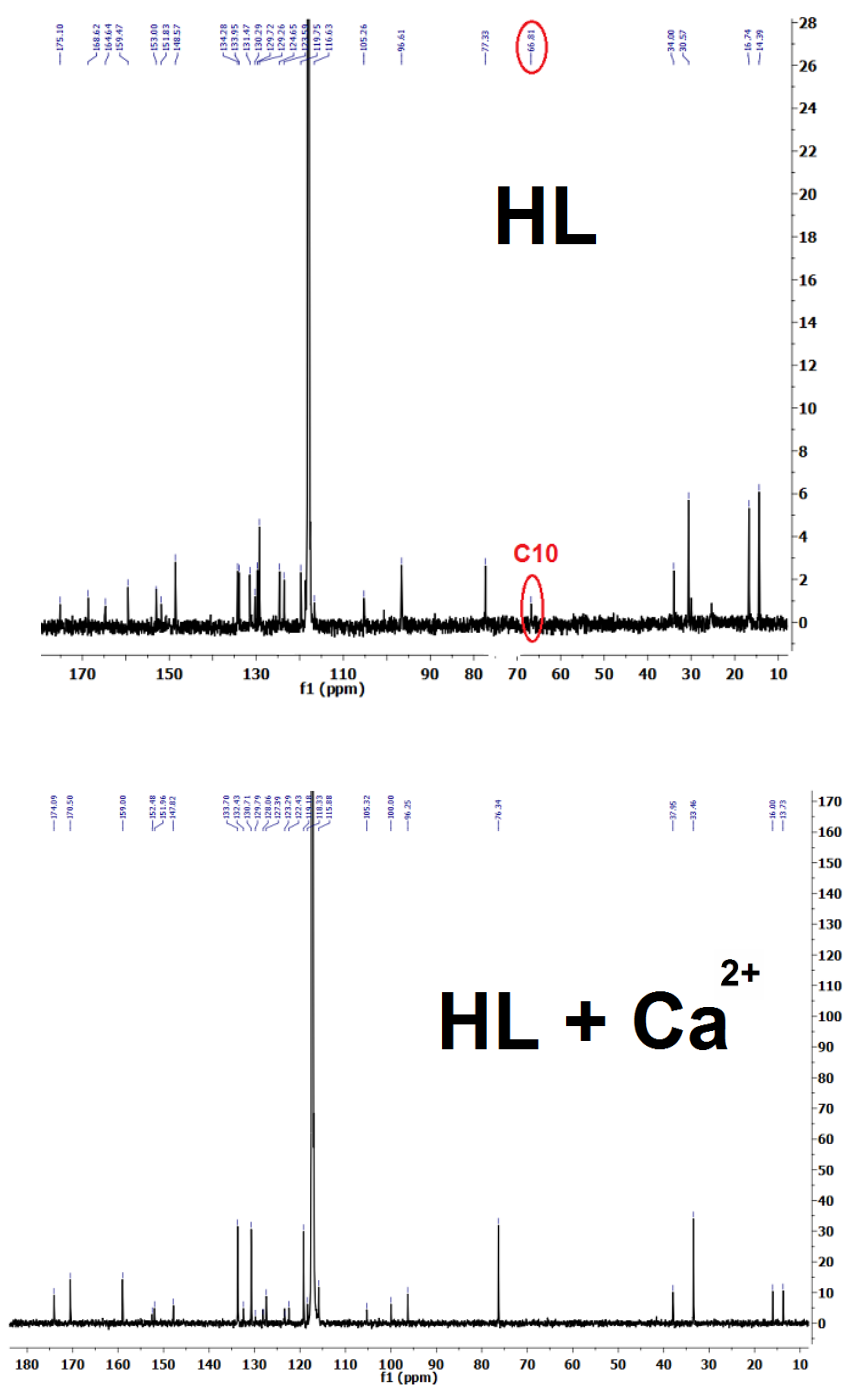

Figure S2. Mass spectrum of HL

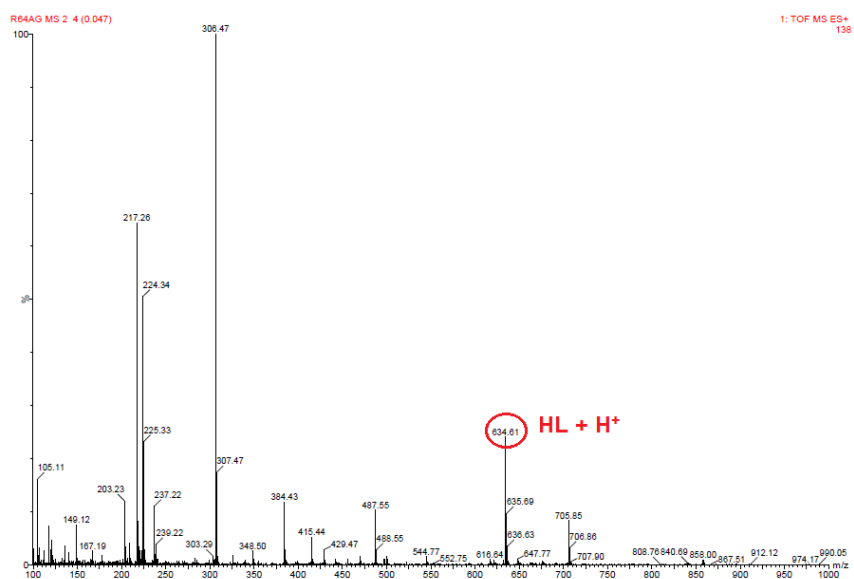

Mass spectrum of CaL indicating 1:1 binding of HL with Ca<sup>2+</sup>

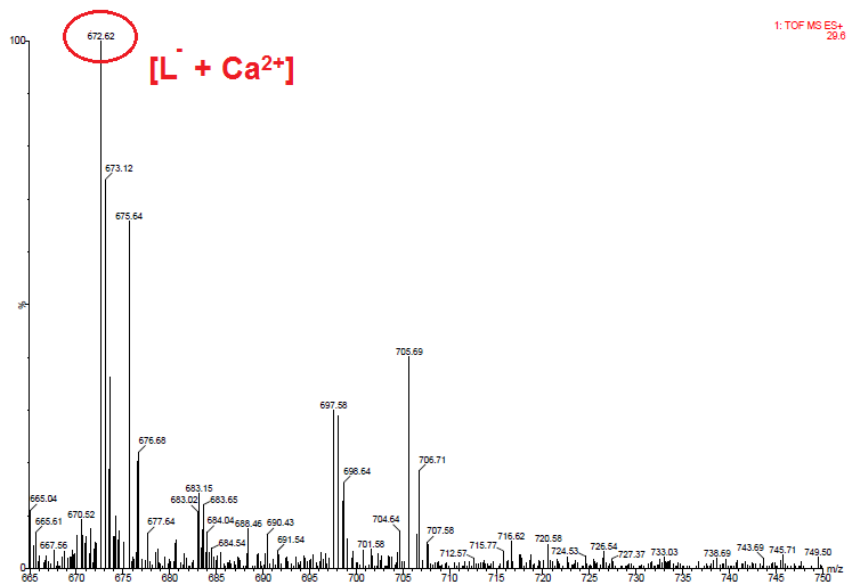

**Figure S3.** Fluorescence intensity of **HL** (10  $\mu\text{M}$ ) and  $\text{Ca}^{2+}$  (10  $\mu\text{M}$ ) mixture in the presence of 1 mM  $\text{Mg}^{2+}$ .

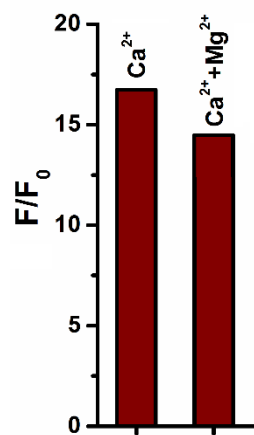

**Figure S4.** Effect of  $\text{Ca}^{2+}$  ( $10\ \mu\text{M}$ ) binding to **HL** ( $10\ \mu\text{M}$ ) in presence of  $\text{EDTA}^{2-}$  (5-equiv) and L-cysteine (5-equiv), separately.

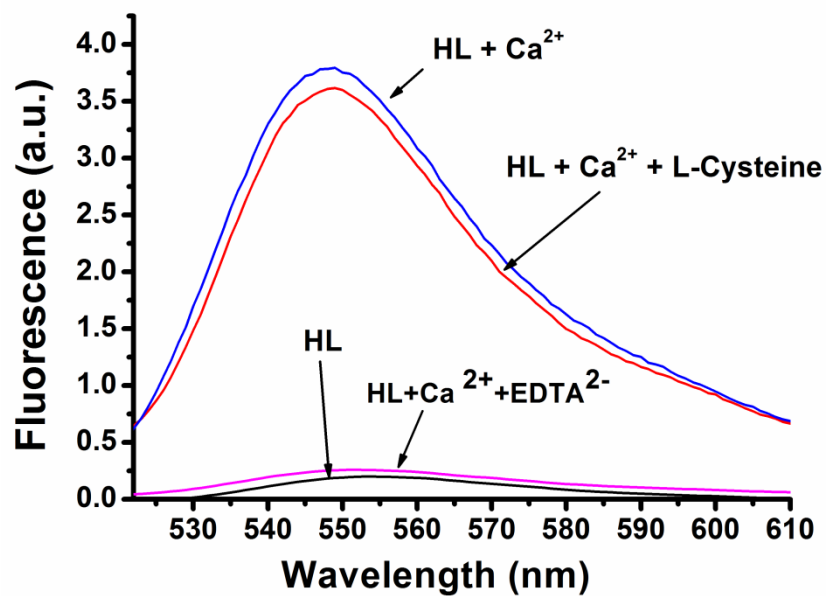

**Figure S5.** Effect of  $\text{Cu}^{2+}$  ( $10\ \mu\text{M}$ ) binding to **HL** ( $10\ \mu\text{M}$ ) in presence of  $\text{EDTA}^{2-}$  (5-equiv) and L-cysteine (5-equiv), separately.

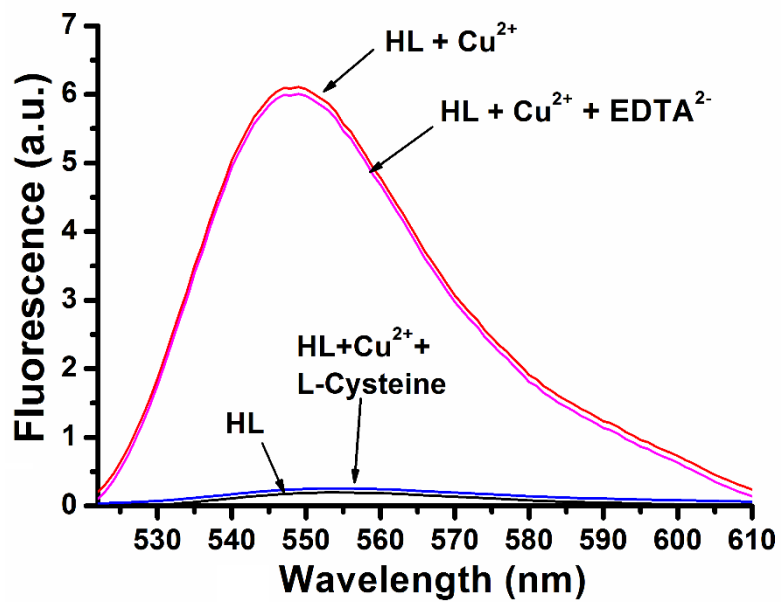

**Table S1.** Toxicity results of **HL** studied with *Artemia*

| <b>No. of <i>Artemia</i></b> | <b>Control</b> | <b>Sensor, HL (20 <math>\mu</math>M)</b> | <b>Sensor, HL (60 <math>\mu</math>M)</b> |
|------------------------------|----------------|------------------------------------------|------------------------------------------|
| 50                           | 50             | 50                                       | 48                                       |
| 50                           | 50             | 50                                       | 48                                       |
| 50                           | 50             | 50                                       | 48                                       |



**Table S2.** Comparison of optical properties of **HL** with the organic and water-organic mixture soluble  $\text{Ca}^{2+}$ -selective chemosensors.

| Receptor                                   | K <sub>d</sub><br>( $\mu$ M) | LO<br>D | $\Phi_f$<br>(free) | $\Phi_f$<br>(bound) | $\Phi_f$<br>Enhancement<br>ratio | Inter<br>ference | Solvent<br>system  | Bio-<br>imaging<br>system | Excitation<br>Region<br>(nm) | Ref |
|--------------------------------------------|------------------------------|---------|--------------------|---------------------|----------------------------------|------------------|--------------------|---------------------------|------------------------------|-----|
| 9-AA-2                                     | 0.275                        | NA      | 0.00030            | 0.0039              | 13                               | NA               | CH <sub>3</sub> CN | NA                        | 362                          | 4a  |
| 9-AA-3                                     | 0.176                        | NA      | 0.00026            | 0.0042              | 16                               | NA               | CH <sub>3</sub> CN | NA                        | 362                          | 4a  |
| 9-AA-4                                     | 0.152                        | NA      | 0.00033            | 0.014               | 42                               | NA               | CH <sub>3</sub> CN | NA                        | 362                          | 4a  |
| Squaraine-bichromophoric<br>podands 3a     |                              | NA      | 0.008              | NA                  |                                  | NA               | CH <sub>3</sub> CN | NA                        | 570                          | 4c  |
| Squaraine-bichromophoric<br>podands 3b     |                              |         | 0.014              |                     |                                  | NA               | CH <sub>3</sub> CN | NA                        | 570                          | 4c  |
| Squaraine-bichromophoric<br>podands 3c     |                              |         | 0.023              |                     |                                  | NA               | CH <sub>3</sub> CN | NA                        | 570                          | 4c  |
| Squaraine-bichromophoric<br>podands 4a     |                              |         | 0.06               |                     |                                  | NA               | CH <sub>3</sub> CN | NA                        | 570                          | 4c  |
| Squaraine-Foldamer-1b                      | 0.23                         | NA      | 0.032              | 0.008               | 0.25                             | NA               | CH <sub>3</sub> CN | NA                        | 580                          | 4d  |
| BODIPY-calixarene                          | 0.019                        | NA      | NA                 | NA                  |                                  | NA               | CH <sub>3</sub> CN | NA                        | 485                          | 4h  |
| DMDAP                                      | 0.1                          | NA      | NA                 | NA                  | NA                               | NA               | CH <sub>3</sub> CN | NA                        | 247                          | 4e  |
| Chemo sensor 1                             | 0.176                        | NA      | NA                 | NA                  | NA                               | NA               | CH <sub>3</sub> CN | NA                        | 438                          | 4f  |
| Chemo sensor 2                             | 0.161                        | NA      | NA                 | NA                  | NA                               | NA               | CH <sub>3</sub> CN | NA                        | 438                          | 4f  |
| acridinedione-<br>bichromophoric podand-1b | 0.261                        | NA      | 0.122              | NA                  | NA                               | NA               | CH <sub>3</sub> CN | NA                        | 381                          | 4i  |
| acridinedione-<br>bichromophoric podand-1c | 0.207                        | NA      | 0.123              | NA                  | NA                               | NA               | CH <sub>3</sub> CN | NA                        | 381                          | 4i  |

## Notes and references

4 (a) T. Morozumi, T. Anada and H. Nakamura, *J. Phys. Chem. B*, 2001, **105**, 2923-2931; (c) E. Arunkumar, P. Chithra and A. Ajayaghosh, *J. Am. Chem. Soc.*, 2004, **126**, 6590-6598; (d) E. Arunkumar, A. Ajayaghosh and J. Daub, *J. Am. Chem. Soc.*, 2005, **127**, 3156-3164; (e) C. -F. Lin, Y. -H. Liu, C. -C. Lai, S. -M. Peng and S. -H. Chiu, *Chem. Eur. J.*, 2006, **12**, 4594-4599; (f) J. Kim, T. Morozumi and H. Nakamura, *Org. Lett.*, 2007, **9**, 4419-4422; (g) M. Suresh and A. Das, *Tetrahedron Lett.*, 2009, **50**, 5808-5812; (h) H. J. Kim and J. S. Kim, *Tetrahedron Letters*, 2006, **47**, 7051-7055; (i) P. Ashokkumar, V. T. Ramakrishnan and P. Ramamurthy, *Eur. J. Org. Chem.*, 2009, 5941-5947.
